# Supplementary material for: Cost-effective Sb-doped SnO2 films as stable and efficient alternative transparent conducting electrodes for dye-sensitized solar cells
Source: Royal Society of Chemistry journal article supplement (doi:10.1039/d1tc06110k), 2022-01-01
Supplement: d1tc06110k1.pdf [file d1tc06110k1.pdf]

## Supplementary Information

### Cost-effective Sb-doped SnO<sub>2</sub> as stable and efficient alternative transparent conducting electrode for dye-sensitized solar cells

Nandarapu Purushotham Reddy<sup>a</sup>, Reddivari Muniramaiah<sup>a</sup>, Rompivalasa Santhosh<sup>b</sup>,  
Jean Maria Fernandes<sup>a</sup>, Dilli Babu Padmanaban<sup>c</sup>, Gouranga Maharana<sup>a</sup>, M. Kovendhan<sup>d</sup>,  
D. Paul Joseph<sup>a\*</sup>, Banavoth Murali<sup>b\*</sup>

<sup>a</sup>Department of Physics, National Institute of Technology, Warangal, Telangana State-506004, India

<sup>b</sup>Solar cells and Photonics Research Laboratory, School of Chemistry, University of Hyderabad, Hyderabad, Telangana State-500046, India.

<sup>c</sup>Nanotechnology & Integrated Bio-Engineering Centre (NIBEC), Ulster University, Jordanstown, Newtownabbey, Co, Antrim, BT370QB, UK.

<sup>d</sup>Department of Physics and Nanotechnology, SRM Institute of Science and Technology, Kattankulathur, Tamilnadu-603203, India.

\*Corresponding authors e-mail: paul@nitw.ac.in, murali.banavoth@uohyd.ac.in

#### S1. Energy dispersive X-ray (EDX) spectrum

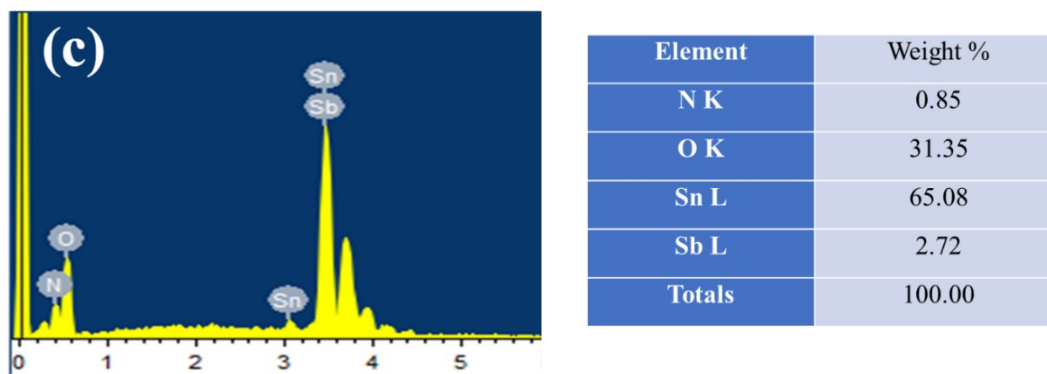

Fig. S1. EDX spectrum of ATO thin film showing the presence of constituent elements.

## S2. Semi-log plot of the respective J-V characteristics

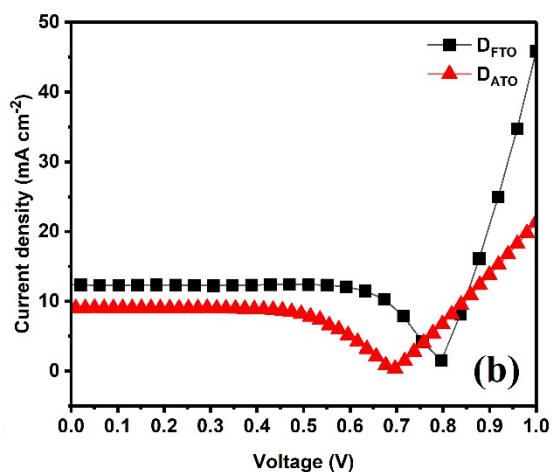

**Fig. S2.** Semi-log plots corresponding to the  $J$ - $V$  characteristics measured under AM 1.5 G solar illumination of the D<sub>FTO</sub> and D<sub>ATO</sub> devices.

## S3. Electrochemical impedance spectroscopy

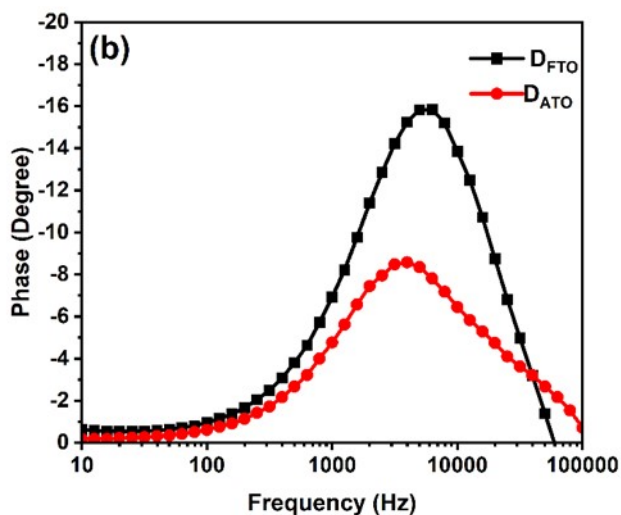

**Fig. S3.** Bode plot for DSSCs fabricated using the ATO and FTO conductive substrates.
